# Supplementary material for: Function of Cancer Associated Genes Revealed by Modern Univariate and Multivariate Association Tests
Source: PLoS One. 2015 May 12;10(5):e0126544. doi: 10.1371/journal.pone.0126544 (PMC4429101; doi:10.1371/journal.pone.0126544)
Supplement: S2 Table — A list of pathways obtained from KEGG. Alongside each pathway are the genes from our dataset included within the KEGG pathway. The pathways chosen were those containing at least five genes from our list, or apoptosis—which we considered exceptionally interesting. (XLSX) [file pone.0126544.s003.xlsx]

## Sheet: pathways-new
abbreviation	Name	Genes
ras	Ras signaling pathway	REL RHOA NRAS HRAS EGFR INSR GAB1 MET GNG4 ZAP70 RAF1 ABL1 FGFR4 FGFR2 PAK1
wnt	Wnt signaling pathway	CCND1 TP53 MYC JUN RHOA
tcel	T cell receptor signaling pathway	JUN HRAS TEC NRAS ZAP70 RHOA RAF1 PAK1
reg	Regulation of actin cytoskeleton	RHOA NRAS HRAS EGFR RAF1 FGFR4 CHRM3 FGFR2 PAK1
apo	Apoptosis	TP53 BCL2
axo	Axon guidance	EPHB2 HRAS NRAS MET ABL1 RHOA PAK1
foc	Focal adhesion	ERBB2 CCND1 EGFR HRAS JUN MET RHOA RAF1 PAK1 BCL2
cel	Cell cycle	TP53 CCND1 CDC25B CDKN1A CDK6 ABL1 MYC
fox	FoxO signaling pathway	CCND1 NRAS CDKN1A EGFR INSR BCL6 RAF1 HRAS
